# Supplementary material
Source: PubMed Central journal article supplement (PMC2667068)
Supplement: 0812782106_0812782106SI.pdf [file 0812782106_0812782106SI.pdf]

# Supporting Information

Lemos *et al.* 10.1073/pnas.0812782106

## SI Text

**Isolation and Culture of Peritoneal Cells (PCs).** The peritoneal wash was centrifuged at  $275 \times g$  for 10 min, and PC viability was determined by trypan blue exclusion. PCs were cultured in 96-well flat-bottom plates (Nunc) at  $6 \times 10^5$  viable cells/well in complete RPMI medium 1640 supplemented with 5% FBS (Life

Technologies), penicillin/gentamicin (100  $\mu\text{g/ml}$ , Sigma-Aldrich), streptomycin (150 IU/ml, Sigma-Aldrich) and were stimulated with or without IL-23 in the presence or absence of indomethacin (10 or 100  $\mu\text{g/ml}$ ), PGE<sub>2</sub> (0.1 or 1  $\mu\text{M}$ ), or IL-12 (0.1 or 1 ng/ml) for 24 h. Culture supernatants were harvested, and IL-17 and IFN $\gamma$  concentrations were measured.

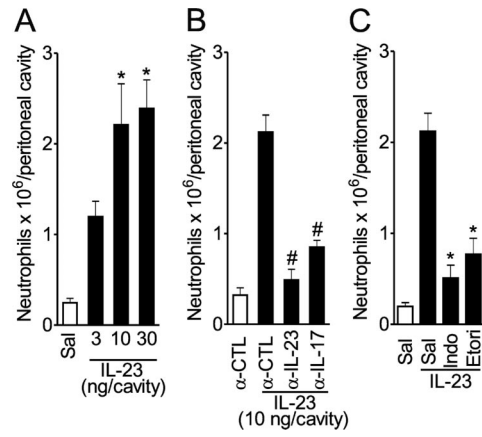

**Fig. S1.** (A and B) Neutrophils harvested from the peritoneal cavity 4 h after i.p. injection of IL-23 (3–30 ng/cavity, closed bars) or saline (Sal, open bar) in mice treated 5 min before with IgG control ( $\alpha$ -CTL), anti-IL-23 (5  $\mu$ g/cavity), or anti-IL-17 (10  $\mu$ g/cavity) antibodies. (C) Neutrophils harvested from peritoneal cavity 4 h after i.p. injection of IL-23 (10 ng/cavity; closed bars) or saline (Sal, open bar) in mice treated 30 min before with indomethacin (Indo) or etoricoxib (Etori). \* $P < 0.05$  vs. saline control group; # $P < 0.05$  vs. IL-23 group. Data are mean  $\pm$  SEM,  $n = 5$ , representative of 3 experiments.

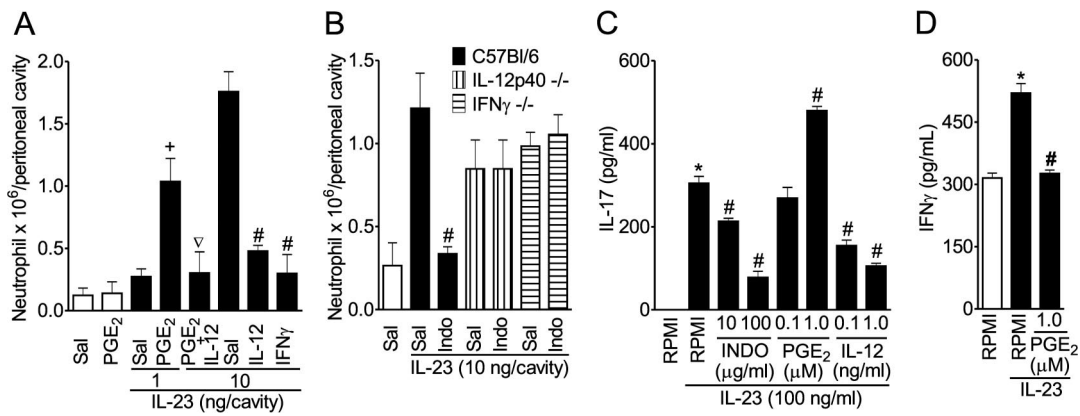

**Fig. S2.** (A and B) Neutrophils harvested from peritoneal cavity 4 h after the i.p. injection of IL-23 (1 or 10 ng/cavity) or saline (Sal, open bar) in wild-type, IL-12p40<sup>-/-</sup>, or IFN $\gamma$ <sup>-/-</sup> mice. Some mice were treated with a co-injection of PGE<sub>2</sub> (30 pg/peritoneal cavity), IL-12 (0.1 ng/peritoneal cavity), IFN $\gamma$  (1 ng/cavity), PGE<sub>2</sub> (30 pg/cavity) plus IL-12 (0.1 ng/cavity), or indomethacin (Indo, 5 mg/kg, s.c. 30 min earlier). (C and D) Peritoneal cells harvested from naive C57BL/6 mice were cultured in the presence or absence of IL-23, indomethacin (INDO), PGE<sub>2</sub>, or IL-12 for 24 h at indicated concentrations. IL-17 and IFN $\gamma$  concentrations in culture supernatants were determined by ELISA. \**P* < 0.05 vs. medium (RPMI) controls; #*P* < 0.05 vs. IL-23 (10 ng/cavity) or IL-23 (100 ng/ml); ∇*P* < 0.05 vs. IL-23 (1 ng/cavity); +*P* < 0.05 vs. IL-23 (1 ng/cavity) plus PGE<sub>2</sub>. Data are mean ± SEM, *n* = 5, representative of at least 2 experiments.

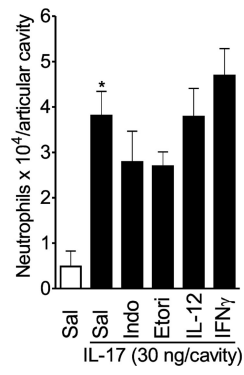

**Fig. S3.** Neutrophils harvested from articular cavity 6 h after intra-articular injection of IL-17 (30 ng/joint) or saline (Sal, *open bars*) in mice treated with a co-injection of IL-12 (0.1 ng/cavity) or IFN $\gamma$  (1 ng/cavity). Some mice were treated 30 min before with indomethacin (Indo, 5 mg/kg, s.c.) or etoricoxib (Etori, 45 mg/kg, s.c.). \* $P < 0.05$  vs. saline control group. Data are mean  $\pm$  SEM,  $n = 5$ , representative of 3 experiments.
